# Supplementary material for: PbFePO4F2 with a 1/6th bond depleted triangular lattice
Source: Royal Society of Chemistry journal article supplement (doi:10.1039/c8dt03802c), 2018-01-01
Supplement: c8dt03802c1.pdf [file c8dt03802c1.pdf]

Supporting Information for:

**PbFe(PO<sub>4</sub>)F<sub>2</sub> with a 1/6th Bond Depleted Triangular Lattice**

*Hongcheng Lu,<sup>†</sup> Hiroshi Kageyama<sup>\*,†§</sup>*

<sup>†</sup> Graduate School of Engineering, Kyoto University, Kyoto 615-8510, Japan

[whibbite@gmail.com](mailto:whibbite@gmail.com); [kage@scl.kyoto-u.ac.jp](mailto:kage@scl.kyoto-u.ac.jp)

\*Corresponding author Email: [kage@scl.kyoto-u.ac.jp](mailto:kage@scl.kyoto-u.ac.jp); Fax: +81-75-383-2510

## Experimental Section

**Caution.** Hydrofluoric acid is toxic and corrosive! It must be handled with extreme caution and the appropriate protective gear.<sup>1-3</sup>

**Synthesis.** Lead (II, III) tetroxide ( $\text{Pb}_3\text{O}_4$ , 97%, Wako), iron (II) oxide ( $\text{FeO}$ , 99.5%, Wako), phosphoric acid (85%  $\text{H}_3\text{PO}_4$  by weight, Wako), and aqueous hydrofluoric acid (46.0~48.0% HF by weight, Wako) were used as received. Black single crystals of  $\text{PbFePO}_4\text{F}_2$  were synthesized by adding 0.2 g (0.88 mmol) of  $\text{Pb}_3\text{O}_4$ , 0.1 g (1.39 mmol) of  $\text{FeO}$ , 0.4 mL (7.67 mmol) of  $\text{H}_3\text{PO}_4$ , 0.8 mL (~22.08 mmol) of 48% aqueous HF to a Teflon [fluoro(ethylenepropylene), FEP] pouch made as described previously;<sup>4-7</sup> All reagents were sealed with a sealer in Teflon pouches, and placed into a 125 mL Parr autoclave with a backfill of 45 mL pure water. The autoclave was quickly heated to 200 °C, held at this temperature for 24 hours and cooled to ambient temperature for 30 hours. The single-crystals of  $\text{PbFePO}_4\text{F}_2$  were recovered in air after vacuum filtration.

**Crystallographic Determination.** The powder X-ray diffraction pattern (PXRD) was collected on the Bruker D8 ADVANCE using Cu  $K\alpha$  radiation ( $\lambda = 1.54184 \text{ \AA}$ ) at a 0.1° step size and 1-second dwell time. Single crystal X-Ray diffraction experiments for determining crystal structures of  $\text{PbFePO}_4\text{F}_2$  were conducted at room temperature (296 K) on a Rigaku R-Axis RAPID image plate diffractometer with Mo  $K\alpha$  radiation ( $\lambda = 0.71073 \text{ \AA}$ ). The crystal-to-detector distance was 127 mm and data integrations were made using Rigaku RAPID-AUTO.<sup>8</sup> Multiscan absorption corrections were applied with Rigaku RAPID-AUTO. The structures were determined by direct methods, completed by Fourier difference syntheses with SIR97,<sup>9</sup> and refined using SHELXL-2014.<sup>10</sup> No additional

symmetry elements were found using the program PLATON.<sup>11</sup> Crystallographic data are reported in Table 1.

**Thermo-gravimetric Analysis (TG-DTA).** The thermogravimetric measurement for  $\text{PbFePO}_4\text{F}_2$  was performed in air from ambient temperature to 900 °C on a Rigaku Thermo plus TG8121 using a Pt pan with a heating rate of 1 °C/min. The sample was held at this temperature for two hours and then cooled to room temperature at a rate of 5 °C/min.

**Magnetic Characterization.** A Quantum Design MPMS-XL superconducting quantum interference device (SQUID) magnetometer was used to collect DC magnetic susceptibility for  $\text{PbFePO}_4\text{F}_2$  between 2 K and 350 K, and magnetization curves at 2 K and 300 K between 0 and 7 T. The magnetic susceptibility was approximate by  $\chi = M/H$  with subtraction of the sample container background and diamagnetic correction derived from Pascal's constants.<sup>12</sup>

**Table 1** Crystal data for PbFePO<sub>4</sub>F<sub>2</sub>.

|                                             |                                    |
|---------------------------------------------|------------------------------------|
| Compound formula                            | PbFePO <sub>4</sub> F <sub>2</sub> |
| Formula weight (g·mol <sup>-1</sup> )       | 396.02                             |
| Temperature (K)                             | 296(2)                             |
| Crystal system                              | Monoclinic                         |
| Space group                                 | <i>P</i> 2 <sub>1</sub> / <i>n</i> |
| <i>a</i> (Å)                                | 5.257(2)                           |
| <i>b</i> (Å)                                | 12.404(5)                          |
| <i>c</i> (Å)                                | 7.098(3)                           |
| $\beta$ (°)                                 | 102.765(9)                         |
| <i>V</i> (Å <sup>3</sup> )                  | 451.4(3)                           |
| <i>Z</i>                                    | 4                                  |
| Maximum $\theta$ (°)                        | 27.5                               |
| $\lambda$ (Mo/Cu <i>K</i> $\alpha$ ) (Å)    | 0.71073                            |
| $\rho_{\text{calc.}}$ (g·cm <sup>-3</sup> ) | 5.827                              |
| <i>R</i> <sub>int</sub>                     | 0.031                              |
| <i>R</i> <sub>1</sub>                       | 0.037                              |
| <i>wR</i> <sub>2</sub>                      | 0.070                              |
| Goodness-of-fit                             | 1.01                               |

**Table 2** Selected bond lengths, angles and BVS calculations for PbFePO<sub>4</sub>F<sub>2</sub>.

| Bond                                   | Bond Length (Å) | <i>s</i> <sub>ij</sub> | Angle            | Degree (°) |
|----------------------------------------|-----------------|------------------------|------------------|------------|
| <b>PbFePO<sub>4</sub>F<sub>2</sub></b> |                 |                        |                  |            |
| Fe(1)–F(1)                             | 2 × 1.941(5)    | 2 × 0.480              | F(1)–Fe(1)–F(1)  | 180        |
| Fe(1)–F(2)                             | 2 × 1.933(5)    | 2 × 0.491              | F(2)–Fe(1)–F(2)  | 180        |
| Fe(1)–O(1)                             | 2 × 1.985(5)    | 2 × 0.542              | O(1)–Fe(1)–O(1)  | 180        |
|                                        |                 | $\Sigma s_{ij} = 3.03$ | Fe(1)–F(1)–Fe(2) | 127.7      |
| Fe(2)–F(1)                             | 2 × 2.012(5)    | 2 × 0.397              | F(1)–Fe(2)–F(1)  | 180        |

|            |                     |                        |                 |       |
|------------|---------------------|------------------------|-----------------|-------|
| Fe(2)–O(3) | $2 \times 1.978(5)$ | $2 \times 0.554$       | O(3)–Fe(2)–O(3) | 180   |
| Fe(2)–O(4) | $2 \times 2.074(5)$ | $2 \times 0.427$       | O(4)–Fe(2)–O(4) | 180   |
|            |                     | $\Sigma s_{ij} = 2.76$ | O(1)–P–O(2)     | 108.7 |
| P–O(1)     | 1.536(6)            | 1.202                  | O(1)–P–O(3)     | 112.9 |
| P–O(2)     | 1.533(6)            | 1.213                  | O(1)–P–O(4)     | 109.5 |
| P–O(3)     | 1.518(6)            | 1.261                  | O(2)–P–O(3)     | 108.2 |
| P–O(4)     | 1.552(6)            | 1.152                  | O(2)–P–O(4)     | 108.4 |
|            |                     | $\Sigma s_{ij} = 4.83$ | O(3)–P–O(4)     | 109.0 |

**Figure S1** Experimental PXRD pattern and simulated pattern for compound  $\text{PbFePO}_4\text{F}_2$  and PXRD pattern for product after TGA at 900 °C.

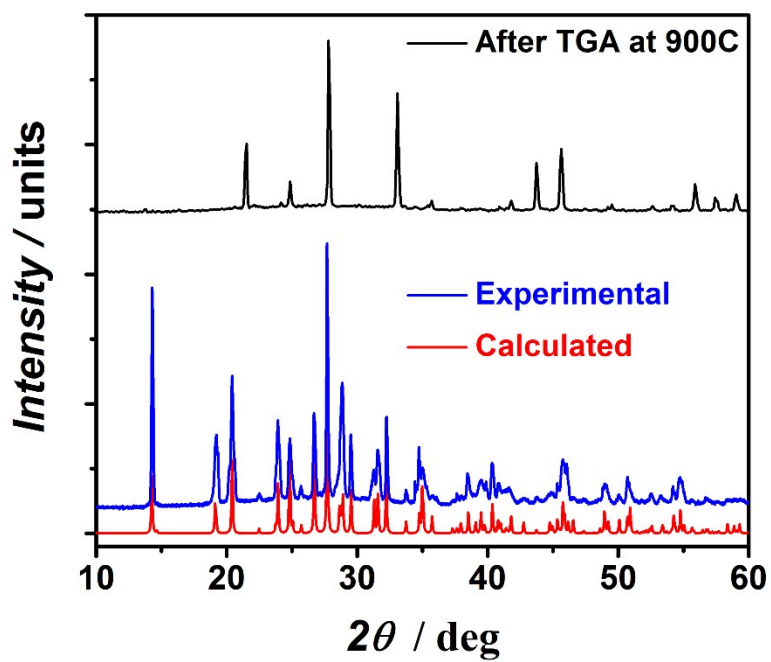

**Figure S2** Coordination for Pb in  $\text{PbFePO}_4\text{F}_2$ .

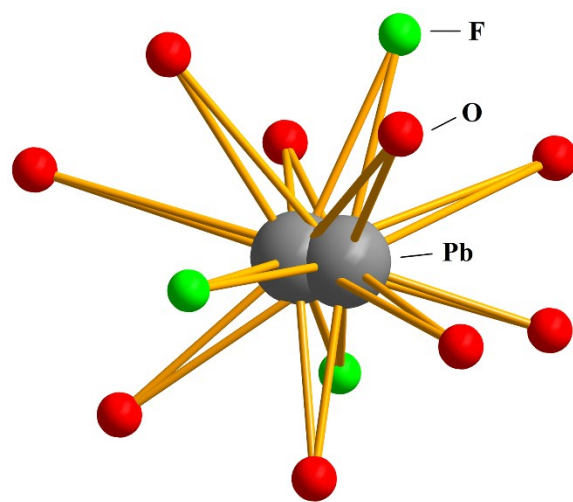

Figure S3 TGA curve of  $\text{PbFePO}_4\text{F}_2$ .

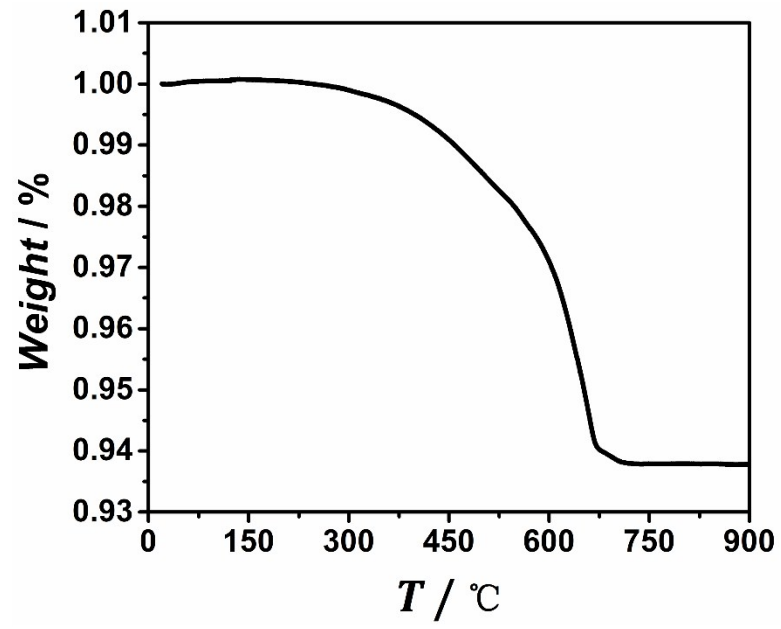



**Figure S4** (a) Curie Weiss fitting for impurity amount of Curie tail; (b) magnetic susceptibility  $\chi(T)$  at 0.1 T (black circle) and 6 T (blue square) for  $\text{PbFePO}_4\text{F}_2$ .

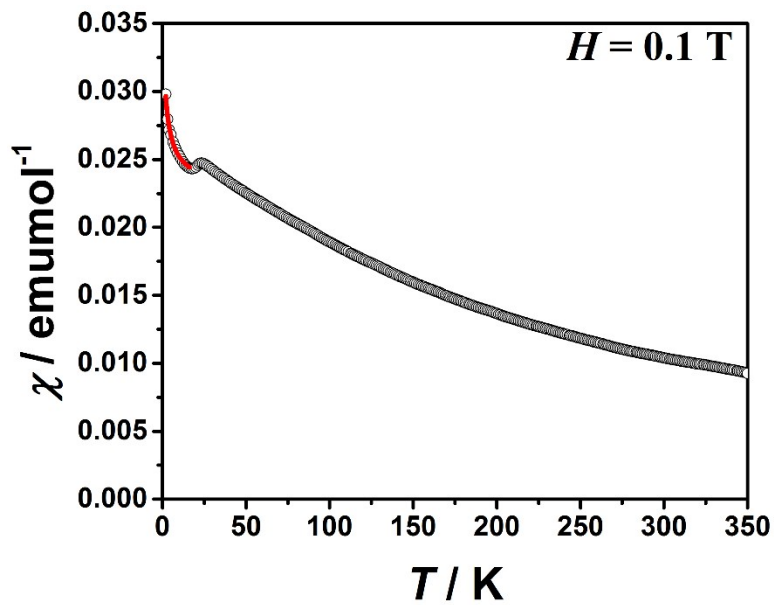

(a)

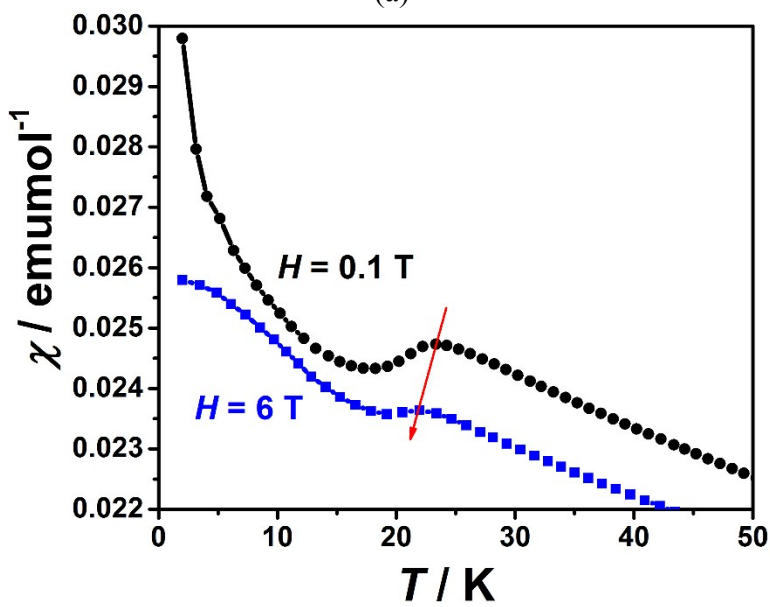

(b)

**Figure S5** Crystal structure for  $\text{PbFePO}_4\text{F}_2$  for reviewing (a) interchain interactions pathways; (b) interlayer interactions pathways.

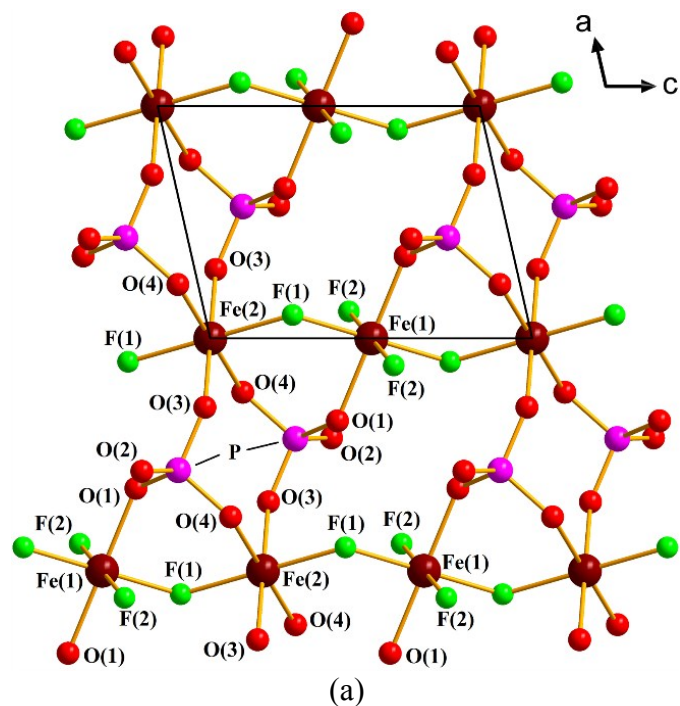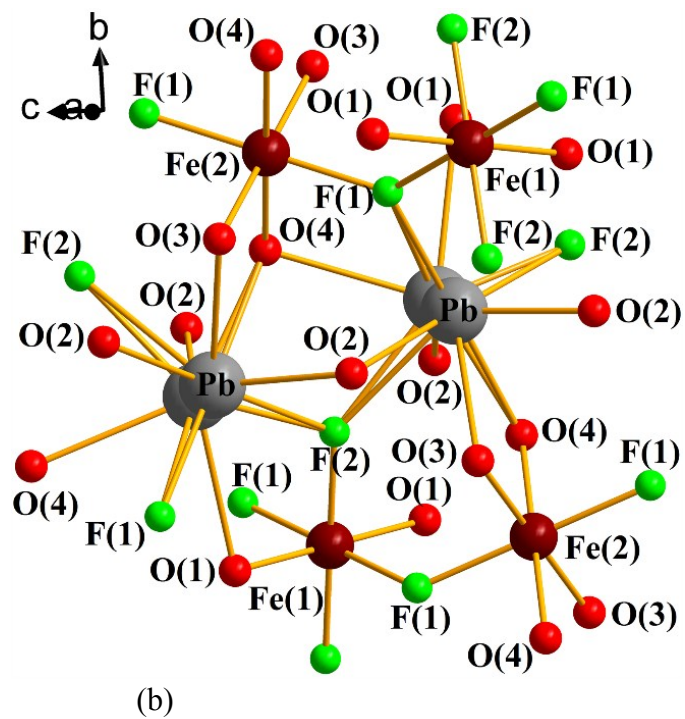

## Reference

1. Peters, D.; Miethchen, R. Symptoms and Treatment of Hydrogen Fluoride Injuries. *J. Fluorine Chem.* **1996**, *79*, 161-165.
2. Segal, E. B. First Aid for a Unique Acid, HF: A Sequel. *Chem. Health Saf.* **2000**, *7*, 18-23.
3. Bertolini, J. C. Hydrofluoric Acid: A Review of Toxicity. *J. Emerg. Med.* **1992**, *10*, 163-168.
4. Halasymani, P. S.; Heier, K. R.; Norquist, A. J.; Stern, C. L.; Poeppelmeier, K. R. Composition Space of the  $(\text{CdO}, 0.5\text{Nb}_2\text{O}_5)/(\text{HF})_x \cdot \text{Pyridine}/\text{H}_2\text{O}$  System. Structure and Synthesis of  $\text{CdNb}(\text{py})_4\text{OF}_5$ . *Inorg. Chem.* **1998**, *37*, 369-371.
5. Lu, H.; Gautier, R.; Donakowski, M. D.; Liu, Z.; Poeppelmeier, K. R. From Solution to the Solid State: Control of Niobium Oxide-Fluoride  $[\text{NbO}_x\text{F}_y]^{n-}$  Species. *Inorg. Chem.* **2014**, *53*, 537-542.
6. Lu, H.; Gautier, R.; Li, Z.-X.; Jie, W.; Liu, Z.; Poeppelmeier, K. R. The Dimeric  $[\text{V}_2\text{O}_2\text{F}_8]^{4-}$  Anion: Structural Characterization of a Magnetic Basic-Building-Unit. *J. Solid State Chem.* **2013**, *200*, 105-109.
7. Lu, H.; Gautier, R.; Donakowski, M. D.; Fuoco, L.; Liu, Z.; Poeppelmeier, K. R. Specific Chemistry of the Anions:  $[\text{TaOF}_5]^{2-}$ ,  $[\text{TaF}_6]^-$ , and  $[\text{TaF}_7]^{2-}$ . *Cryst. Growth Des.* **2014**, *14*, 844-850.
8. Rigaku Rigaku Corporation: Tokyo, Japan, **2006**.
9. Altomare, A.; Burla, M. C.; Camalli, M.; Cascarano, G. L.; Giacovazzo, C.; Guagliardi, A.; Moliterni, A. G. G.; Polidori, G.; Spagna, R. SIR97: A New Tool for Crystal Structure Determination and Refinement. *J. Appl. Crystallogr.* **1999**, *32*, 115-119.
10. Sheldrick, G. A Short History of SHELX. *Acta Crystallogr. A* **2008**, *64*, 112-122.
11. Spek, A. L. *Platon*, Utrecht University, Utrecht, The Netherlands, **2001**.
12. Bain, G. A.; Berry, J. F. Diamagnetic Corrections and Pascal's Constants. *J. Chem. Educ.* **2008**, *85*, 532.
13. Lu, H.; Kageyama, H.  $\text{CsFe}_3(\text{SeO}_3)_2\text{F}_6$  with  $S = 5/2$  Cube Tile Lattice. *Inorg. Chem.* **2018**, *57*, 6186-6190.
